# Supplementary material for: Graphitic carbon nitride nanosheets: one-step, high-yield synthesis and application for Cu2+detection
Source: Royal Society of Chemistry journal article supplement (doi:10.1039/c4an00914b), 2014-07-30
Supplement: c4an00914b1.pdf [file c4an00914b1.pdf]

## Electronic Supplementary Information

# Graphitic carbon nitride nanosheets: one-step high-yield synthesis and application for Cu<sup>2+</sup> detection

Ningyan Cheng,<sup>a,b</sup> Ping Jiang,<sup>a</sup> Qian Liu,<sup>a</sup> Jingqi Tian,<sup>a,b</sup> Abdullah M. Asiri<sup>c,d</sup> and Xuping Sun<sup>a,c,d\*</sup>

### Experimental section

**Material:** KBH<sub>4</sub> and Sodium hexametaphosphate were purchased from Aladdin Ltd. (Shanghai, China). Na<sub>2</sub>SO<sub>4</sub>, Na<sub>2</sub>S<sub>2</sub>O<sub>8</sub>, Tris, HCl, Co(NO<sub>3</sub>)<sub>2</sub>·6H<sub>2</sub>O, Fe(NO<sub>3</sub>)<sub>3</sub>·9H<sub>2</sub>O, Hg(NO<sub>3</sub>)<sub>2</sub>, Mg(NO<sub>3</sub>)<sub>2</sub>·6H<sub>2</sub>O, Ni(NO<sub>3</sub>)<sub>2</sub>·6H<sub>2</sub>O, Pb(NO<sub>3</sub>)<sub>2</sub>, Zn(NO<sub>3</sub>)<sub>2</sub>·6H<sub>2</sub>O, Mn(NO<sub>3</sub>)<sub>2</sub> and melamine were purchased from Beijing Chemical Corp. All chemicals were used as received without further purification.

**Characterizations:** SEM measurements were made on a XL30 ESEM FEG scanning electron microscope at an accelerating voltage of 20 kV. AFM analysis was taken with MultiMode-V (Veeco Metrology, Tnc.). TEM measurements were made on a Hitachi H-8100 EM (Hitachi, Tokyo, Japan) with an accelerating applied potential of 200 kV. XRD data were collected using a RigakuD/MAX 2550 diffractometer with Cu K $\alpha$  radiation ( $\lambda=1.5418$  Å). The UV-vis spectra were recorded on a UV580C spectrophotometer. RF-5301PC was used to record the fluorescent emission spectra. The ECL curves were recorded using a MPI-A electrochemiluminescence analyzer system (Xi'an Remax Analysis Instrument Co., Ltd., Xi'an, China).

**Preparation of g-C<sub>3</sub>N<sub>4</sub> nanosheets and b-g-C<sub>3</sub>N<sub>4</sub>:** g-C<sub>3</sub>N<sub>4</sub> nanosheets were prepared as follows. In brief, melamine and KBH<sub>4</sub> with a mole ratio of 5:1 were mixed together

and heated at 550°C for 4 h in Ar atmosphere. 0.5 g products were dispersed in 500 mL water for characterization and further use. For comparison, b-g-C<sub>3</sub>N<sub>4</sub> was obtained using the same procedure without the presence of KBH<sub>4</sub>.

**Detection of Cu<sup>2+</sup>:** The detection of Cu<sup>2+</sup> was performed in tris-HCl (pH =7.0) at room temperature. In detail, 4.5 μL of g-C<sub>3</sub>N<sub>4</sub> nanosheets dispersion was added into 250 μL of tris-HCl buffer first, then certain amount of Cu<sup>2+</sup> was added to it. The fluorescent emission spectra were studied at room temperature after reaction for 10 min.

**Analysis of real water samples:** The real water samples were taken from the South Lake of Changchun, Jilin province, China. These samples were filtered through a 0.22 μm membrane and then centrifuged at 12000 for 10 min. The resultant water samples were spiked with standard solutions containing different concentrations of Cu<sup>2+</sup>.

**Preparation of g-C<sub>3</sub>N<sub>4</sub> nanosheets modified FTO glass:** 100 μL g-C<sub>3</sub>N<sub>4</sub> nanosheets dispersion and 10 μL of Nafion (0.5 wt%) were dropped on cleaned FTO glass and dried in air for further use.

**Electrochemistry and electrochemiluminescence of g-C<sub>3</sub>N<sub>4</sub> nanosheets:** ECL investigations were carried out in 0.1 M Na<sub>2</sub>SO<sub>4</sub> containing 3 mM Na<sub>2</sub>S<sub>2</sub>O<sub>8</sub>. ECL signals were obtained by cyclic voltammetry between 0 to -1.3V with a three electrode system, using Ag/AgCl as reference electrode, Pt wire as counter electrode and g-C<sub>3</sub>N<sub>4</sub> nanosheets modified FTO glass as working electrode.

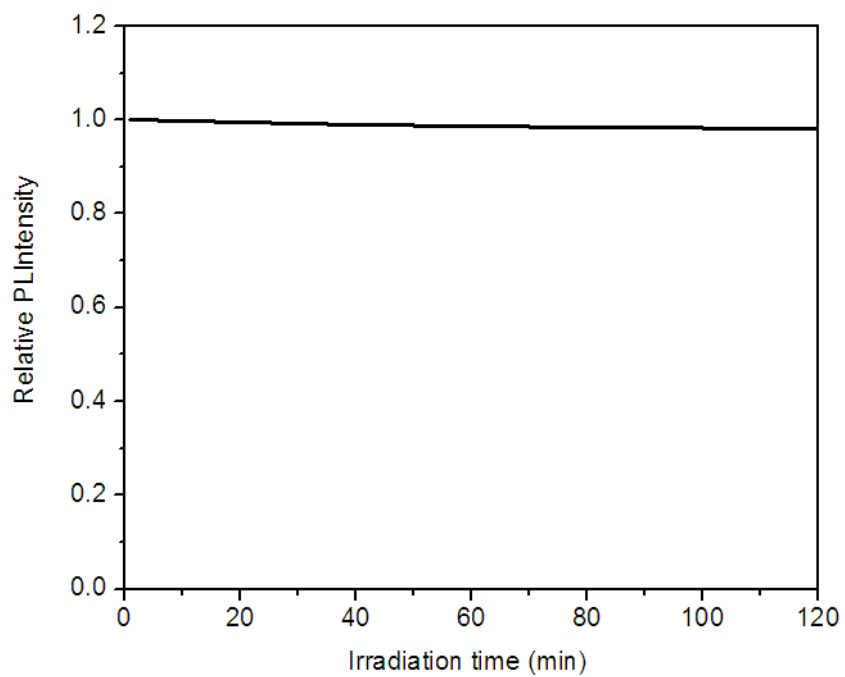

**Fig. S1** Curve of PL intensity of the g-C<sub>3</sub>N<sub>4</sub> nanosheet and irradiation time.

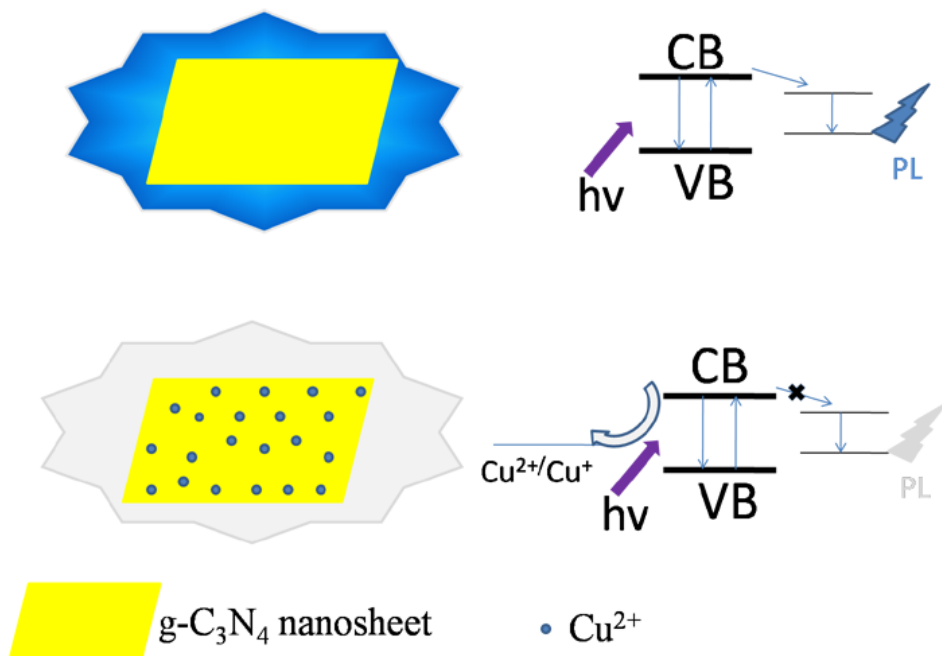

Scheme S1

**Table S1** Comparison of sensing performance of different fluorescent probes for Cu<sup>2+</sup> detection.

| Fuorosensor                                          | Detection limit (nM) | Linear range (nM)   | Ref.      |
|------------------------------------------------------|----------------------|---------------------|-----------|
| CdS QDs                                              | 100                  | -                   | 4a        |
| 16-MHA capped CdSe QDs                               | 5                    | 5-1×10 <sup>5</sup> | 4b        |
| PPNDs                                                | 1                    | 0-5×10 <sup>4</sup> | 6         |
| c-mpg-C <sub>3</sub> N <sub>4</sub>                  | 12.3                 | 10-100              | 11        |
| ultrathin g-C <sub>3</sub> N <sub>4</sub> nanosheets | 0.5                  | 0-1×10 <sup>4</sup> | 12        |
| F-g-C <sub>3</sub> N <sub>4</sub> dots               | 0.5                  | 0-5×10 <sup>4</sup> | 19        |
| pyridoxal-based chemosensor                          | 140                  | 0-5×10 <sup>4</sup> | 20a       |
| BCNO NPs                                             | 100                  | 0-5×10 <sup>4</sup> | 20b       |
| g-C <sub>3</sub> N <sub>4</sub> nanosheets           | 0.5                  | 0-1×10 <sup>3</sup> | This work |

**Table S2.** Selectivity coefficients of  $\text{Cu}^{2+}$  against other metal ions.

| Metal ions       | Selectivity coefficient |
|------------------|-------------------------|
| $\text{Co}^{2+}$ | 21.26                   |
| $\text{Fe}^{3+}$ | 18.58                   |
| $\text{Hg}^{2+}$ | 50.01                   |
| $\text{Mg}^{2+}$ | 11.83                   |
| $\text{Mn}^{2+}$ | 34.84                   |
| $\text{Ni}^{2+}$ | 27.21                   |
| $\text{Pb}^{2+}$ | 21.56                   |
| $\text{Zn}^{2+}$ | 11.61                   |

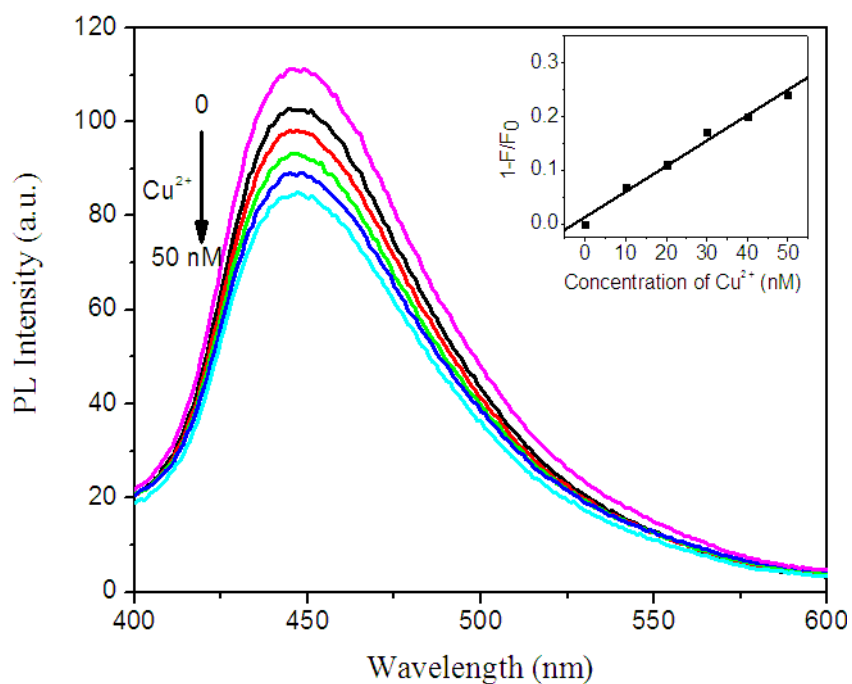

**Fig. S2** PL spectra of g-C<sub>3</sub>N<sub>4</sub> nanosheets dispersion in the presence of different Cu<sup>2+</sup> concentration (from top to bottom: 0, 10, 20, 30, 40, 50 nM) in lake water. Inset: dependent of  $1-F/F_0$  on the concentration of Cu<sup>2+</sup> ions within the range of 0-50 nM (excitation at 335 nm;  $F_0$  and  $F$  are the g-C<sub>3</sub>N<sub>4</sub> nanosheets fluorescence intensities at 450 nm in the absence and presence of Cu<sup>2+</sup> ions, respectively).
